# Supplementary material for: Evolution of Adaptive Variation in the Mosquito Culex pipiens: Multiple Independent Origins of Insecticide Resistance Mutations
Source: MDPI journal article supplement (doi:10.3390/insects12080676), 2021-07-27
Supplement: s1 [file s1]

**Supplementary Table S1.** Average uncorrected p-distance between the chs-alleles found in *Culex pipiens* populations. The alleles are numbered from a1 to 32 as shown in Figure 2. In bold the chs-alleles carrying the DFB mutations are shown: a7 (I1043L mutation); a11 and a18 (I1043M mutation); a13, a15, and a24 (I1043F mutation).

|     | a1     | a2     | a3     | a4     | a5     | a6     | a7     | a8     | a9     | a10    | a11    | a12    | a13    | a14    | a15    | a16    | a17    | a18    | a19    | a20    | a21    | a22    | a23    | a24    | a25    | a26    | a27    | A28    | a29    | a30    | a31    | a32   |
|-----|--------|--------|--------|--------|--------|--------|--------|--------|--------|--------|--------|--------|--------|--------|--------|--------|--------|--------|--------|--------|--------|--------|--------|--------|--------|--------|--------|--------|--------|--------|--------|-------|
| a1  | *****  |        |        |        |        |        |        |        |        |        |        |        |        |        |        |        |        |        |        |        |        |        |        |        |        |        |        |        |        |        |        |       |
| a2  | 0,0083 | *****  |        |        |        |        |        |        |        |        |        |        |        |        |        |        |        |        |        |        |        |        |        |        |        |        |        |        |        |        |        |       |
| a3  | 0,0116 | 0,0033 | *****  |        |        |        |        |        |        |        |        |        |        |        |        |        |        |        |        |        |        |        |        |        |        |        |        |        |        |        |        |       |
| a4  | 0,0016 | 0,0099 | 0,0133 | *****  |        |        |        |        |        |        |        |        |        |        |        |        |        |        |        |        |        |        |        |        |        |        |        |        |        |        |        |       |
| a5  | 0,0269 | 0,0252 | 0,0270 | 0,0286 | *****  |        |        |        |        |        |        |        |        |        |        |        |        |        |        |        |        |        |        |        |        |        |        |        |        |        |        |       |
| a6  | 0,0133 | 0,0116 | 0,0150 | 0,0149 | 0,0269 | *****  |        |        |        |        |        |        |        |        |        |        |        |        |        |        |        |        |        |        |        |        |        |        |        |        |        |       |
| a7  | 0,0033 | 0,0116 | 0,0150 | 0,0016 | 0,0304 | 0,0166 | *****  |        |        |        |        |        |        |        |        |        |        |        |        |        |        |        |        |        |        |        |        |        |        |        |        |       |
| a8  | 0,0252 | 0,0235 | 0,0235 | 0,0269 | 0,0409 | 0,0184 | 0,0286 | *****  |        |        |        |        |        |        |        |        |        |        |        |        |        |        |        |        |        |        |        |        |        |        |        |       |
| a9  | 0,0150 | 0,0100 | 0,0099 | 0,0167 | 0,0201 | 0,0184 | 0,0184 | 0,0269 | *****  |        |        |        |        |        |        |        |        |        |        |        |        |        |        |        |        |        |        |        |        |        |        |       |
| a10 | 0,0133 | 0,0116 | 0,0116 | 0,0116 | 0,0287 | 0,0133 | 0,0133 | 0,0218 | 0,0150 | *****  |        |        |        |        |        |        |        |        |        |        |        |        |        |        |        |        |        |        |        |        |        |       |
| a11 | 0,0218 | 0,0167 | 0,0184 | 0,0234 | 0,0356 | 0,0218 | 0,0252 | 0,0218 | 0,0218 | 0,0167 | *****  |        |        |        |        |        |        |        |        |        |        |        |        |        |        |        |        |        |        |        |        |       |
| a12 | 0,0200 | 0,0150 | 0,0167 | 0,0217 | 0,0339 | 0,0200 | 0,0234 | 0,0201 | 0,0201 | 0,0150 | 0,0016 | *****  |        |        |        |        |        |        |        |        |        |        |        |        |        |        |        |        |        |        |        |       |
| a13 | 0,0066 | 0,0050 | 0,0083 | 0,0083 | 0,0270 | 0,0133 | 0,0083 | 0,0252 | 0,0116 | 0,0133 | 0,0184 | 0,0167 | *****  |        |        |        |        |        |        |        |        |        |        |        |        |        |        |        |        |        |        |       |
| a14 | 0,0183 | 0,0100 | 0,0133 | 0,0200 | 0,0320 | 0,0217 | 0,0217 | 0,0338 | 0,0167 | 0,0218 | 0,0269 | 0,0252 | 0,0150 | *****  |        |        |        |        |        |        |        |        |        |        |        |        |        |        |        |        |        |       |
| a15 | 0,0116 | 0,0033 | 0,0066 | 0,0133 | 0,0287 | 0,0150 | 0,0133 | 0,0269 | 0,0133 | 0,0150 | 0,0201 | 0,0184 | 0,0049 | 0,0133 | *****  |        |        |        |        |        |        |        |        |        |        |        |        |        |        |        |        |       |
| a16 | 0,0234 | 0,0184 | 0,0201 | 0,0251 | 0,0304 | 0,0234 | 0,0269 | 0,0235 | 0,0201 | 0,0184 | 0,0050 | 0,0033 | 0,0201 | 0,0286 | 0,0218 | *****  |        |        |        |        |        |        |        |        |        |        |        |        |        |        |        |       |
| a17 | 0,0150 | 0,0133 | 0,0133 | 0,0166 | 0,0270 | 0,0050 | 0,0184 | 0,0133 | 0,0167 | 0,0116 | 0,0218 | 0,0201 | 0,0150 | 0,0235 | 0,0167 | 0,0235 | *****  |        |        |        |        |        |        |        |        |        |        |        |        |        |        |       |
| a18 | 0,0287 | 0,0270 | 0,0287 | 0,0304 | 0,0016 | 0,0287 | 0,0321 | 0,0427 | 0,0218 | 0,0304 | 0,0339 | 0,0356 | 0,0287 | 0,0338 | 0,0304 | 0,0321 | 0,0287 | *****  |        |        |        |        |        |        |        |        |        |        |        |        |        |       |
| a19 | 0,0201 | 0,0116 | 0,0116 | 0,0218 | 0,0150 | 0,0235 | 0,0235 | 0,0321 | 0,0083 | 0,0201 | 0,0270 | 0,0252 | 0,0167 | 0,0184 | 0,0150 | 0,0218 | 0,0217 | 0,0167 | *****  |        |        |        |        |        |        |        |        |        |        |        |        |       |
| a20 | 0,0235 | 0,0218 | 0,0218 | 0,0252 | 0,0269 | 0,0235 | 0,0269 | 0,0357 | 0,0218 | 0,0167 | 0,0287 | 0,0269 | 0,0235 | 0,0286 | 0,0252 | 0,0235 | 0,0252 | 0,0287 | 0,0201 | *****  |        |        |        |        |        |        |        |        |        |        |        |       |
| a21 | 0,0150 | 0,0066 | 0,0083 | 0,0166 | 0,0252 | 0,0183 | 0,0184 | 0,0287 | 0,0116 | 0,0167 | 0,0201 | 0,0184 | 0,0116 | 0,0133 | 0,0100 | 0,0218 | 0,0184 | 0,0269 | 0,0133 | 0,0252 | *****  |        |        |        |        |        |        |        |        |        |        |       |
| a22 | 0,0116 | 0,0066 | 0,0066 | 0,0133 | 0,0270 | 0,0116 | 0,0150 | 0,0201 | 0,0100 | 0,0083 | 0,0150 | 0,0133 | 0,0083 | 0,0167 | 0,0100 | 0,0167 | 0,0099 | 0,0288 | 0,0150 | 0,0219 | 0,0117 | *****  |        |        |        |        |        |        |        |        |        |       |
| a23 | 0,0218 | 0,0201 | 0,0167 | 0,0235 | 0,0339 | 0,0116 | 0,0252 | 0,0201 | 0,0235 | 0,0184 | 0,0270 | 0,0269 | 0,0218 | 0,0304 | 0,0235 | 0,0304 | 0,0066 | 0,0340 | 0,0286 | 0,0287 | 0,0252 | 0,0133 | *****  |        |        |        |        |        |        |        |        |       |
| a24 | 0,0184 | 0,0167 | 0,0167 | 0,0200 | 0,0304 | 0,0050 | 0,0200 | 0,0201 | 0,0201 | 0,0150 | 0,0252 | 0,0235 | 0,0150 | 0,0269 | 0,0167 | 0,0269 | 0,0066 | 0,0322 | 0,0252 | 0,0287 | 0,0218 | 0,0133 | 0,0133 | *****  |        |        |        |        |        |        |        |       |
| a25 | 0,0200 | 0,0183 | 0,0217 | 0,0183 | 0,0304 | 0,0066 | 0,0200 | 0,0184 | 0,0251 | 0,0166 | 0,0218 | 0,0200 | 0,0200 | 0,0285 | 0,0217 | 0,0234 | 0,0116 | 0,0321 | 0,0303 | 0,0303 | 0,0251 | 0,0184 | 0,0184 | 0,0116 | *****  |        |        |        |        |        |        |       |
| a26 | 0,0184 | 0,0133 | 0,0150 | 0,0200 | 0,0321 | 0,0184 | 0,0218 | 0,0235 | 0,0184 | 0,0133 | 0,0133 | 0,0116 | 0,0150 | 0,0235 | 0,0167 | 0,0150 | 0,0184 | 0,0339 | 0,0235 | 0,0252 | 0,0167 | 0,0117 | 0,0252 | 0,0218 | 0,0251 | *****  |        |        |        |        |        |       |
| a27 | 0,0184 | 0,0100 | 0,0099 | 0,0200 | 0,0167 | 0,0217 | 0,0218 | 0,0303 | 0,0066 | 0,0183 | 0,0252 | 0,0235 | 0,0150 | 0,0167 | 0,0133 | 0,0235 | 0,0200 | 0,0184 | 0,0016 | 0,0218 | 0,0116 | 0,0133 | 0,0269 | 0,0234 | 0,0285 | 0,0218 | *****  |        |        |        |        |       |
| a28 | 0,0150 | 0,0066 | 0,0033 | 0,0167 | 0,0304 | 0,0184 | 0,0184 | 0,0269 | 0,0133 | 0,0150 | 0,0218 | 0,0201 | 0,0116 | 0,0167 | 0,0100 | 0,0235 | 0,0167 | 0,0322 | 0,0150 | 0,0253 | 0,0117 | 0,0100 | 0,0201 | 0,0201 | 0,0251 | 0,0184 | 0,0133 | *****  |        |        |        |       |
| a29 | 0,0033 | 0,0083 | 0,0116 | 0,0016 | 0,0269 | 0,0133 | 0,0033 | 0,0252 | 0,0150 | 0,0100 | 0,0218 | 0,0200 | 0,0099 | 0,0183 | 0,0116 | 0,0234 | 0,0150 | 0,0287 | 0,0201 | 0,0235 | 0,0150 | 0,0116 | 0,0218 | 0,0184 | 0,0166 | 0,0184 | 0,0184 | 0,0150 | *****  |        |        |       |
| a30 | 0,0218 | 0,0201 | 0,0218 | 0,0234 | 0,0321 | 0,0218 | 0,0252 | 0,0150 | 0,0218 | 0,0167 | 0,0133 | 0,0116 | 0,0218 | 0,0234 | 0,0235 | 0,0150 | 0,0218 | 0,0339 | 0,0269 | 0,0252 | 0,0200 | 0,0184 | 0,0287 | 0,0252 | 0,0218 | 0,0167 | 0,0252 | 0,0252 | 0,0218 | *****  |        |       |
| a31 | 0,0133 | 0,0116 | 0,0116 | 0,0150 | 0,0287 | 0,0133 | 0,0167 | 0,0184 | 0,0150 | 0,0066 | 0,0201 | 0,0184 | 0,0133 | 0,0218 | 0,0150 | 0,0218 | 0,0083 | 0,0304 | 0,0201 | 0,0201 | 0,0167 | 0,0083 | 0,0150 | 0,0116 | 0,0200 | 0,0167 | 0,0183 | 0,0150 | 0,0133 | 0,0201 | *****  |       |
| a32 | 0,0200 | 0,0184 | 0,0201 | 0,0217 | 0,0339 | 0,0200 | 0,0234 | 0,0133 | 0,0235 | 0,0150 | 0,0116 | 0,0099 | 0,0201 | 0,0252 | 0,0218 | 0,0133 | 0,0201 | 0,0356 | 0,0287 | 0,0269 | 0,0218 | 0,0167 | 0,0269 | 0,0235 | 0,0200 | 0,0150 | 0,0269 | 0,0235 | 0,0200 | 0,0016 | 0,0184 | ***** |
